# Supplementary material
Source: PubMed Central journal article supplement (PMC5027806)
Supplement: supp_WNL.0000000000003088_table_e-1.pdf [file supp_WNL.0000000000003088_table_e-1.pdf]

**Supplementary Table e-1. The ApoE allele in patients with and without cSS**

| <b>APOE genotypes, n (%)</b> | <b>No cSS (n=507)</b> | <b>Any cSS (n=13)</b> | <b>Focal cSS (n=7)</b> | <b>Disseminated cSS (n=6)</b> |
|------------------------------|-----------------------|-----------------------|------------------------|-------------------------------|
| <b>Any e2</b>                | 51 (4)                | 2 (5)                 | 1 (14)                 | 1 (14)                        |
| <b>Any e4</b>                | 248 (17)              | 7 (18)                | 4 (57)                 | 3 (43)                        |
| <b>e2/e2</b>                 | 2 (0.5)               | 0 (0)                 | 0 (0)                  | 0 (0)                         |
| <b>e2/e3</b>                 | 33 (7)                | 2 (15)                | 1 (14)                 | 1 (17)                        |
| <b>e2/e4</b>                 | 16 (3)                | 0 (0)                 | 0 (0)                  | 0 (0)                         |
| <b>e3/e3</b>                 | 221 (44)              | 4 (31)                | 2 (27)                 | 2 (33)                        |
| <b>e3/e4</b>                 | 169 (33)              | 3 (23)                | 2 (29)                 | 1 (17)                        |
| <b>e4/e4</b>                 | 63 (31)               | 4 (31)                | 2 (27)                 | 2 (33)                        |

cSS= cortical superficial siderosis
